# Supplementary material
Source: MDPI journal article supplement (https://www.mdpi.com/2304-6740/11/7/290)
Supplement: s1 [file s1]

### Supplementary Information

To the article “Metal hydride hydrogen storage (compression) units operating at near-atmospheric pressure of the feed  $H_2$ ”, by B. Tarasov, A. Arbuzov, S. Mozhzhukhin, A. Volodin, P. Fursikov, M.W. Davids, J. Adeniran and M. Lototsky

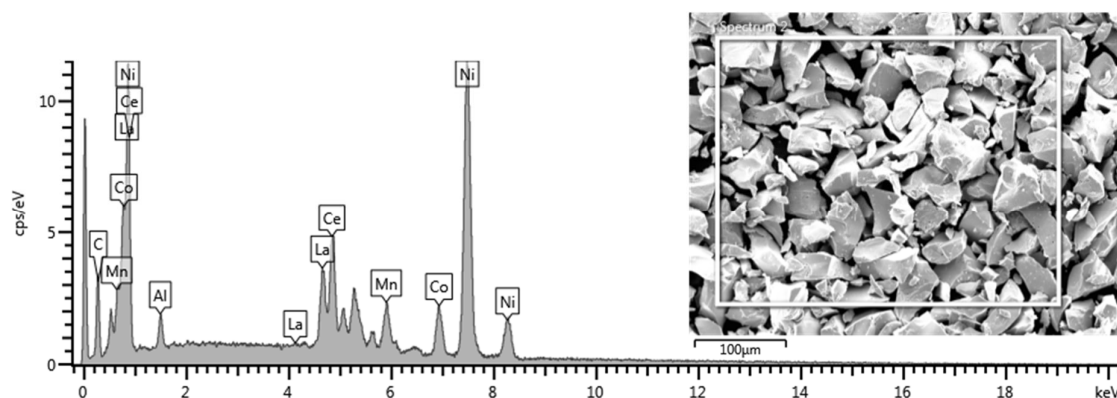

Figure S1. Energy dispersion spectrum and low magnification SEM image of the multi-component  $AB_5$ -type alloy

Table S1. Summary of EDX analysis of the multi-component  $AB_5$ -type alloy

| Element | Wt%        | Atomic % | Component in $AB_{5\pm x}$ (subtotal) | Stoichiometry in the formula                             |
|---------|------------|----------|---------------------------------------|----------------------------------------------------------|
| La      | 13.56±0.32 | 6.9      | A (17.0)                              | 0.41                                                     |
| Ce      | 20.02±0.34 | 10.1     |                                       | 0.59                                                     |
| Ni      | 52.32±0.38 | 62.99    | B (83.0)                              | 3.71                                                     |
| Co      | 7.41±0.2   | 8.89     |                                       | 0.52                                                     |
| Mn      | 4.8±0.16   | 6.17     |                                       | 0.36                                                     |
| Al      | 1.89±0.11  | 4.95     |                                       | 0.29                                                     |
| Totals  | SUM=100    | SUM=100  | B/A=4.88                              | $La_{0.41}Ce_{0.59}Ni_{3.71}Co_{0.52}Mn_{0.36}Al_{0.29}$ |

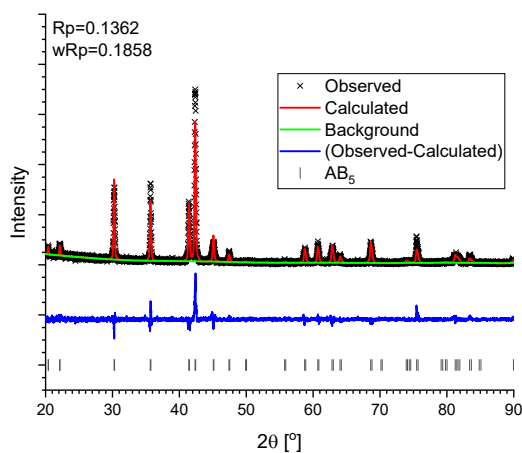

**LaNi<sub>4.45</sub>Al<sub>0.55</sub> (alloy)**

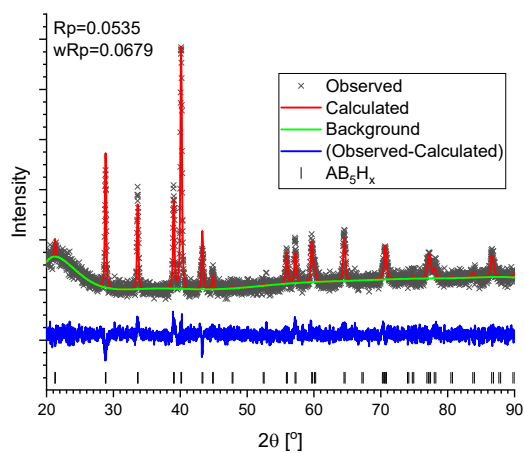

**LaNi<sub>4.45</sub>Al<sub>0.55</sub> (hydride)**

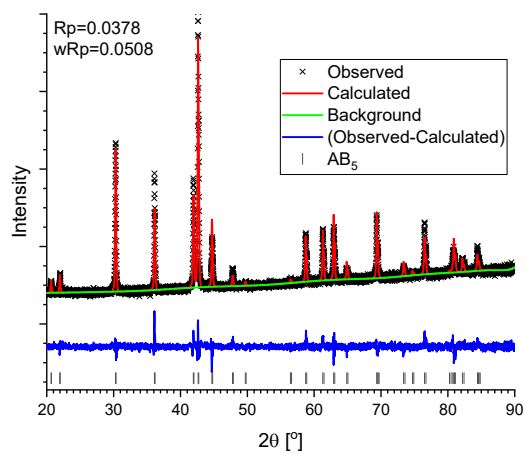

**La<sub>0.41</sub>Ce<sub>0.59</sub>Ni<sub>3.71</sub>Co<sub>0.52</sub>Mn<sub>0.36</sub>Al<sub>0.29</sub> (alloy)**

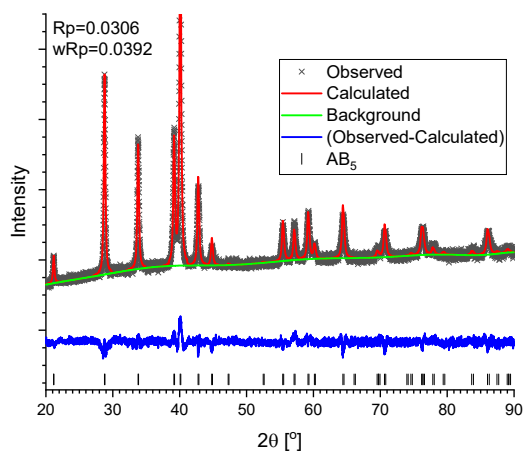

**La<sub>0.41</sub>Ce<sub>0.59</sub>Ni<sub>3.71</sub>Co<sub>0.52</sub>Mn<sub>0.36</sub>Al<sub>0.29</sub> (hydride)**

*Figure S2. Refined XRD patterns of the studied samples*

Table S2. Summary of Rietveld refinement of XRD patterns of the studied samples

| Parameter                   | Value                                   |                                      |                                                                                                                   |                                      |
|-----------------------------|-----------------------------------------|--------------------------------------|-------------------------------------------------------------------------------------------------------------------|--------------------------------------|
|                             | LaNi <sub>4.45</sub> Al <sub>0.55</sub> |                                      | La <sub>0.41</sub> Ce <sub>0.59</sub> Ni <sub>3.71</sub> Co <sub>0.52</sub> Mn <sub>0.36</sub> Al <sub>0.29</sub> |                                      |
|                             | Alloy                                   | Hydride                              | Alloy                                                                                                             | Hydride                              |
| Phase (weight fraction)     | AB <sub>5</sub> (1.0)                   | AB <sub>5</sub> H <sub>x</sub> (1.0) | AB <sub>5</sub> (1.0)                                                                                             | AB <sub>5</sub> H <sub>x</sub> (1.0) |
| <i>a</i> [Å]                | 5.0355(1)                               | 5.3302(2)                            | 4.97948(4)                                                                                                        | 5.34975(8)                           |
| <i>c</i> [Å]                | 4.0230(1)                               | 4.1783(3)                            | 4.05629(6)                                                                                                        | 4.2550(1)                            |
| <i>V</i> [Å <sup>3</sup> ]  | 88.344(4)                               | 102.808(8)                           | 87.102(2)                                                                                                         | 105.462(3)                           |
| Crystallite size [nm]       | 300                                     | 100                                  | 100                                                                                                               | 55                                   |
| Strain [%]                  | 0                                       | 0                                    | 0                                                                                                                 | 0                                    |
| Preferred orientation plane | (1 1 0)                                 | None                                 | None                                                                                                              | None                                 |
